# Supplementary material for: Nanoparticle modification of microfluidic cell separation for cancer cell detection and isolation
Source: Royal Society of Chemistry journal article supplement (doi:10.1039/c9an01719d), 2019-10-24
Supplement: c9an01719d1.pdf [file c9an01719d1.pdf]

For submission to: *Analyst*

Nanoparticle Modification of Microfluidic Cell Separation for Cancer Cells Detection  
and Isolation

Supporting Information

Yun Zhou<sup>1</sup>, Ziye Dong<sup>2</sup>, Hermella Andarge<sup>1</sup>, Wei Li<sup>2</sup>, and Dimitri Pappas<sup>1,\*</sup>

<sup>1</sup>Department of Chemistry and Biochemistry, Texas Tech University, Lubbock, TX,

79409, US, and <sup>2</sup>Department of Chemical Engineering, Texas Tech University,

Lubbock, TX, 79409, US.

\*E-mail: d.pappas@ttu.edu

\*Phone: 806-834-1103

\*Fax: 806-742-1289

\*Corresponding author

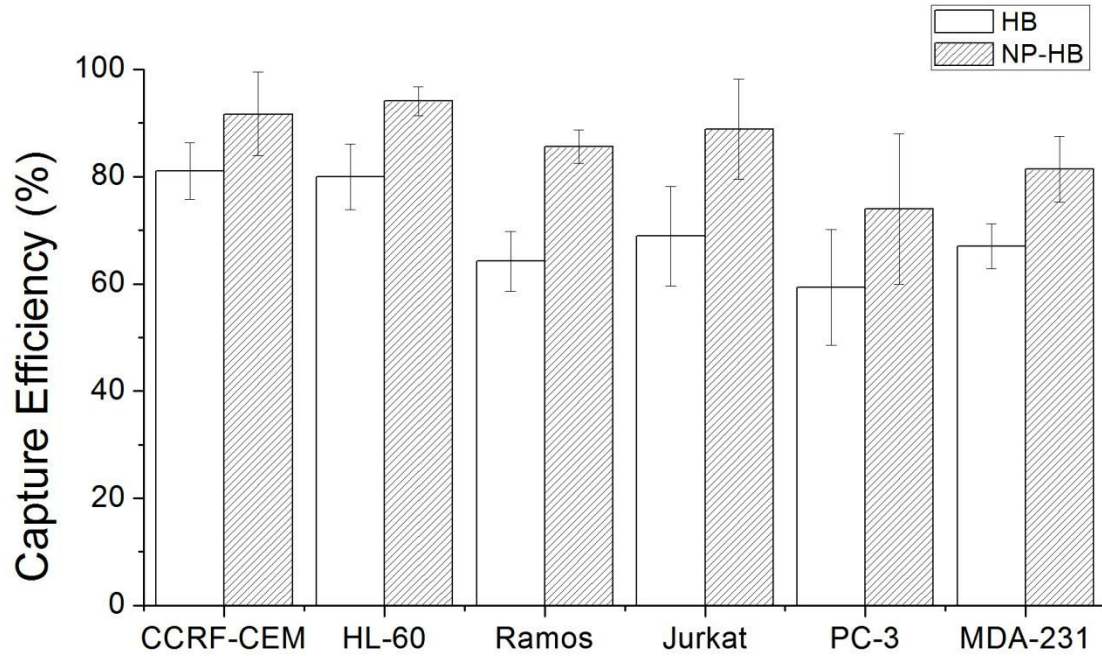

Fig. S1 Capture efficiency of all cell lines involved in this study. The increase of capture for NP-HB measurement of all cell lines in this figure were  $11 \pm 4\%$ ,  $14 \pm 6\%$ ,  $21 \pm 8\%$ ,  $20 \pm 4\%$ ,  $15 \pm 18\%$ , and  $14 \pm 9\%$ . Our NP-modified HB chip showed a great improvement for capture efficiency and has the ability of maintaining capture efficiency at a high level. All these increase were proved as significant via T-test with the p values of 0.0205, 0.0004, 0.0001, 0.004, 0.0334, and 0.0008, respectively. This significant cell capture ability is of great importance in isolating target cells from cell mixtures and blood samples.

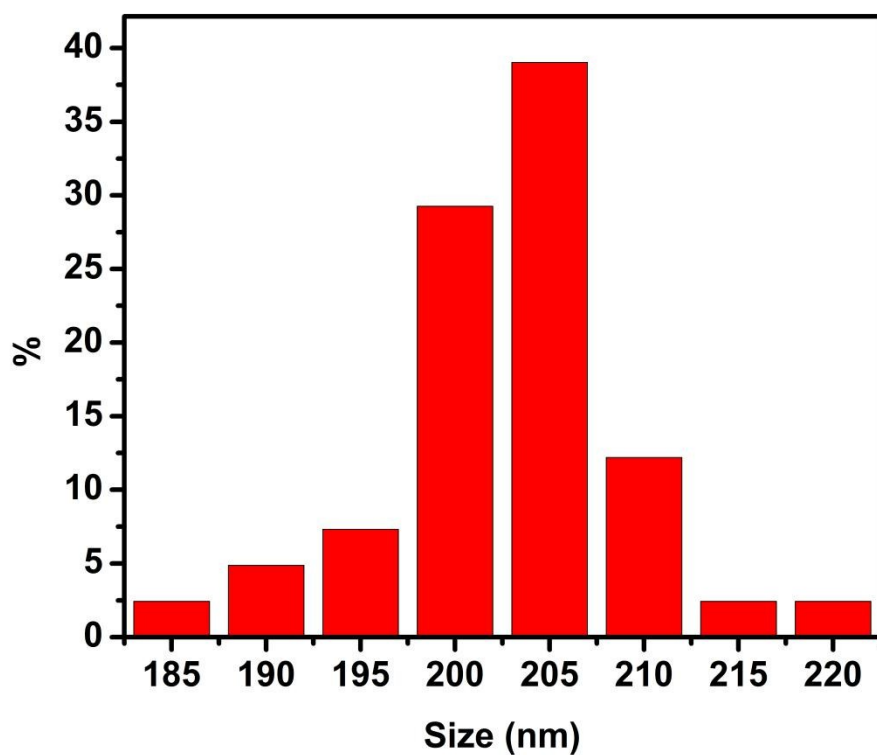

Fig. S2 Size distribution of nanoparticles on NP-HB microchip surface. The average size of nanoparticles is  $202.5 \pm 6.7$  nm. The surface coverage is  $90.1 \pm 4.2\%$ . The nanoparticles attached on the channel surface via electrostatic interactions, and the attachment formed a foundation for subsequent LbL modification
